# Supplementary material
Source: publisher site journal article supplement (https://static.cambridge.org/content/id/urn:cambridge.org:id:article:S1047951120002012/resource/name/S1047951120002012supp001.docx)
Supplement: Supplementary file 1 [file S1047951120002012supp001.docx]

| **Surgery Type** |
| --- |
| **Electrophysiology/Pacemaker** |
| Ablation, surgical |
| AICD implantation |
| Pacemaker generator change |
| Pacemaker implantation, permanent |
| Pacemaker procedure |
| **Surgery on the Heart and Great Vessels** |
| Cardiotomy, other |
| Cor triatriatum repair |
| Ligation, pulmonary artery |
| Pulmonary atresia repair |
| Pulmonary atresia, VSD, MAPCA repair |
| Systemic venous stenosis repair |
| **Valve Surgery** |
| Aortic stenosis, subvalvar, repair |
| Aortic stenosis, subvalvar, repair with myectomy for IHSS |
| Aortic stenosis, supravalvar, repair |
| Double-chambered right ventricle repair |
| Ebstein’s repair |
| Konno procedure |
| Mitral stenosis, supravalvar mitral ring repair |
| Right ventricular outlflow tract procedure |
| Konno procedure |
| Mitral stenosis, supravalvar mitral ring repair |
| Ross procedure |
| Ross-Konno procedure |
| Valve excision, pulmonary |
| Valve replacement, Aortic (bioprosthetic or mechanical) |
| Valve replacement, Mitral |
| Valve replacement, Pulmonic |
| Valve replacement, Tricuspid |
| Valve surgery, other, pulmonic |
| Valve surgery, other, tricuspid |
| Valvuloplasty converted to valve replacement |
| Valvuloplasty, Aortic |
| Valvuloplasty, common atrioventricular valve |
| Valvuloplasty, Mitral |
| Valvuloplasty, Pulmonic |
| Valvuloplasty, Tricuspid |
| Valvuloplasty, Truncal valve |
| **Single Ventricle Repair and Shunt Procedures** |
| 1 ½ ventricle repair |
| ASD creation/enlargement |
| Atrial septal fenestration |
| Bidirectional Glenn |
| Bilateral bidirectional Glenn |
| Conduit placement, LV to PA |
| Conduit placement, RV to PA |
| Conduit reoperation |
| Damus-Kaye-Stansel procedure |
| Fontan + Atrioventricular valvuloplasty |
| Fontan revision or conversion (Re-do Fontan) |
| Fontan, other |
| Fontan, TCPC external conduit, fenestrated |
| Fontan, TCPC, external conduit, nonfenestrated |
| Fontan, TCPC, lateral tunnel, fenestrated |
| HLHS biventricular repair |
| Miscellaneous procedure, other (Glenn takedown, atrial stent removal) |
| Norwood procedure |
| Right atrial plication |
| **Surgery Type, continued** |
| **Single Ventricle Repair and Shunt Procedures, continued** |
| Shunt, ligation and takedown |
| Shunt, reoperation |
| Shunt, systemic to pulmonary, central |
| Shunt, systemic to pulmonary, Modified Blalock-Taussig Shunt |
| Shunt, systemic to pulmonary, other |
| Superior cavopulmonary anastomosis + pulmonary artery reconstruction |
| Superior cavopulmonary anastomosis + atrioventricular valvuloplasty |
| Unidirectional Glenn |
| VSD creation/enlargement |
| Valve closure, semilunar |
| **Septal Defect Repair** |
| ASD partial closure |
| ASD repair, patch |
| ASD repair, patch + PAPVC repair |
| ASD repair, primary closure |
| ASD, common atrium, septation |
| AVSD repair, complete |
| AVSD repair, intermediate/transitional |
| AVSD repair partial |
| DORV, intraventricular tunnel repair |
| PDA closure, device |
| PDA closure, surgical |
| PFO, primary closure |
| Sinus venosus closure, direct or patch |
| TOF AVSD repair |
| TOF absent pulmonary valve, repair  TOF repair, no ventriculotomy |
| TOF repair, RV-PA conduit |
| TOF repair, ventriculotomy, nontransanular patch |
| TOF repair, ventriculotomy, transanular patch |
| VSD repair, patch |
| VSD repair, primary closure |
| VSD repair, multiple |
| **Sinus of Valsalva/Venous Anomaly Repairs** |
| PAPVC repair |
| PAPVC repair, baffle redirection to left atrium with systemic vein translocation (Warden) |
| PAPVC, Scimitar, repair |
| Pulmonary venous stenosis repair |
| Sinus of Valsalva, aneurysm repair |
| TAPVC repair |
| **Transposition of the Great Arteries Repair** |
| Aortic root translocation of left ventricle (including Nikaidoh procedure) |
| Arterial switch operation |
| Arterial switch operation and VSD repair |
| Atrial baffle procedure (non-Mustard, non-Senning) |
| Congenitally corrected TGA repair, double switch |
| Rastelli |
| Senning |
| TGA, other procedure (Kawashia, LV-PA conduit, other) |
| **Truncus Repair** |
| Pulmonary artery origin from ascending aorta (hemitruncus) repair |
| Truncus arteriosus repair |
| **Aortic Anomaly Repair** |
| Aortopulmonary window repair |
| Aortic aneurysm repair |
| Aortic arch repair |
| Aortic arch repair + VSD repair |
| Aortic dissection repair |
| Aortic root replacement, bioprosthetic |
| Aortic root replacement, mechanical |
| **Surgery Type, continued** |
| **Aortic Anomaly Repair, continued** |
| Aortic root replacement, valve-sparing |
| Aortopexy |
| Aortoplasty |
| Coarctation repair + VSD repair |
| Coarctation repair, end to end |
| Coarctation repair, end to end, extended |
| Coarctation repair, other |
| Coarctation repair, patch aortoplasty |
| Coarctation repair, subclavian flap |
| Interrupted aortic arch repair |
| Vascular ring repair |
| **Pulmonary Artery Surgery** |
| PA banding |
| PA debanding |
| PA branch reconstruction, central |
| PA branch reconstruction, peripheral |
| PA main trunk reconstruction |
| Unifocalization MAPCA(s) |
| **Heart Transplant** |
| ECMO cannulation |
| ECMO decannulation |
| ECMO procedure |
| Transplant, heart |
| VAD explantation |
| VAD implantation |
| **Other Cardiac/Non-Cardiac** |
| Anomalous aortic origin of coronary artery repair |
| Anomalous origin of coronary artery from pulmonary artery repair |
| Cardiac tumor resection |
| Coronary artery bypass |
| Coronary artery fistula ligation |
| Coronary artery procedure, other |
| Miscellaneous procedures |
| Pericardial procedure, other (reconstruction) |
| Pulmonary embolectomy |
| Ventricular aneurysm, repair |

Abbreviations: AICD= automatic implantable cardioverter-defibrillator, ASD=atrial septal defect, AVSD=atrioventricular septal defect, DORV=double outlet right ventricle, ECMO=extracorporeal membrane oxygenation, HLHS=hypoplastic left heart syndrome, IHSS=idiopathic hypertrophic subaortic stenosis, LV=left ventricle, MAPCA=major aortopulmonary collateral arteries, PA=pulmonary artery, PAPVC=partial anomalous pulmonary venous connection, PDA=patent ductus arteriosus, PFO=patent foramen ovale, RV=right ventricle, TAPVC=total anomalous pulmonary venous connection, TCPC=total cavopulmonary connection, TGA=transposition of the great arteries, TOF= Tetralogy of Fallot, VAD=ventricular assist device, VSD=ventricular septal defect
